# Supplementary material for: On-Chip Trace Detection of Heavy Metal Ions in Extreme-Deep Seawater Using CMOS-Integrated Low-Noise Transimpedance Amplifiers
Source: Research Square preprint supplement (doi:10.21203/rs.3.rs-6109364/v1), 2025-05-14
Supplement: Supplementary file 1 [file b37058e09ce33c25a936e68d.docx]

On-Chip Trace Detection of Heavy Metal Ions in Extreme-Deep Seawater Using CMOS-Integrated Low-Noise Transimpedance Amplifiers

## *Yiming Yu1, Wei Fu2, Tao Deng2, Chenyu Ma2, Yifan Wang2, Xi Zhang2, Chenhong Cui1, Xu Yao1, Tingyi Zhang1, Shangqi Diao1, Dan Li1, Songqing Lin3, Yuan Gao2,*, Yi Li2,*, Wei Cai1,**

## Advanced Institute for Ocean Research (AIOR), Department of Ocean Science and Engineering, Southern University of Science and Technology, Shenzhen 518055, China

## School of Microelectronics, Southern University of Science and Technology, Shenzhen 518055, China

## Key Laboratory of Ocean and Marginal Sea Geology, South China Sea Institute of Oceanology, Innovation Academy of South China Sea Ecology and Environmental Engineering, Chinese Academy of Sciences, Guangzhou 510301, China

Email: 12332257@mail.sustech.edu.cn

liy37@sustech.edu.cn

gaoy@sustech.edu.cn
caiw@sustech.edu.cn

1. **TIA architecture and circuit**

This work designed a multi-channel, low-noise, high-gain, and scalable transimpedance amplifiers (TIA), offering greater selectivity and portability for heavy metal detection. The on-chip TIA adopts a fully differential architecture, which effectively reduces common-mode interference in the system. The TIA is composed of a first-stage integrator and a second-stage buffer. The integrator, as shown in Supplementary Figure 1, is a crucial component that determines the key performance of the TIA.

A two-stage operational transconductance amplifier (OTA) is used in the integrator (Supplementary Figure 2). The first stage consists of a PMOS input pair with a load utilizing source degeneration techniques, which increases output impedance. The second stage includes a common-source amplifier with NMOS input, aimed at enhancing gain and providing more precise clamping voltage for electrochemical experiments.


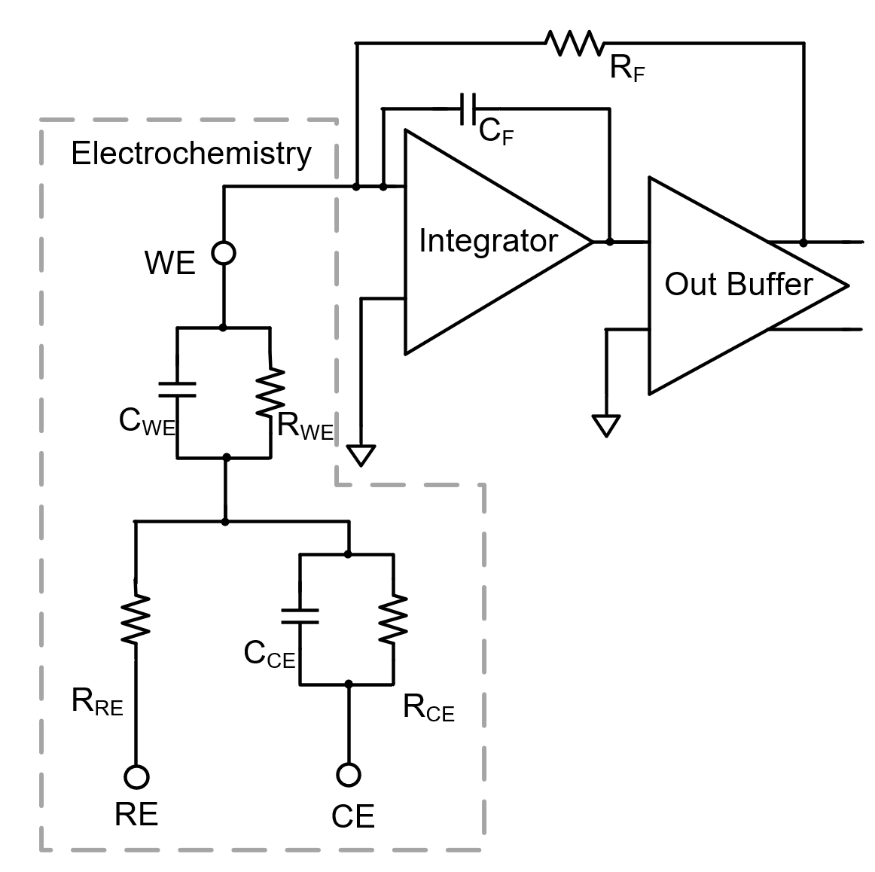


**Supplementary Figure 1:** The architecture of the TIA

Supplementary Figure 3 shows a second-stage non-unity gain buffer, which mitigates the bandwidth reduction caused by the introduction of feedback capacitance to some extent and further reduces the feedback capacitance size while maintaining system stability. The fully differential buffer structure reduces common-mode noise, and the introduction of common-mode feedback further stabilizes the common-mode operating point of the system. The common-mode detection circuit uses a capacitor in parallel with a resistor to reduce impedance at high frequencies, improving the stability of the common-mode feedback circuit.


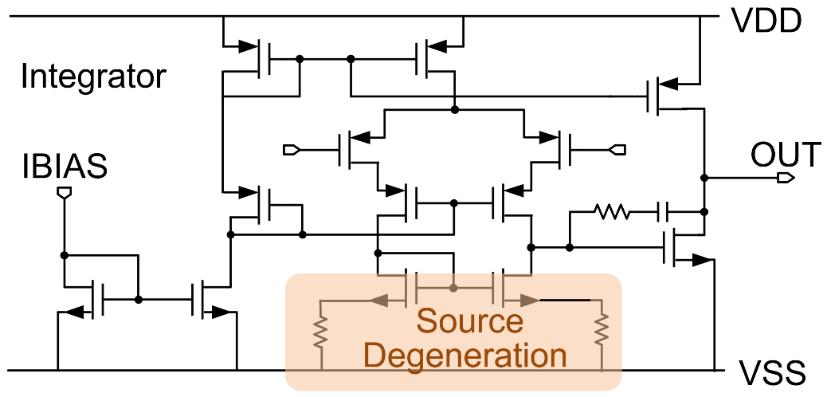


**Supplementary Figure 2:** Integrator circuit of the TIA


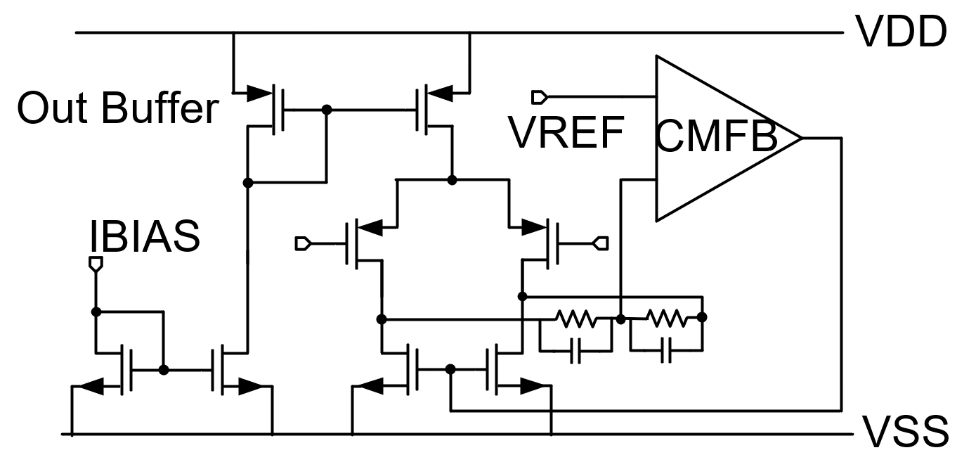


**Supplementary Figure 3:** Out Buffer circuit of the TIA

1. **Noise Analysis and Considerations.**

Supplementary Figure 1 also shows the equivalent impedance diagram of the electrochemical workstation. The input voltage is applied to the RE electrode through the first-stage operational amplifier, while the WE electrode is fixed at the reference potential via the negative feedback of the TIA. Therefore, the current flowing into the inverting terminal of the TIA can be expressed as:

(1)

where *VWE* and *VRE* is the voltage of WE and RE respectively, *RWE* and *CWE* are the equivalent resistor and capacitor of WE and *RRE* is the equivalent resistor of RE.

The selection of the feedback circuit architecture has a significant impact on the performance of the TIA. To achieve better processing of continuous signals and to ensure high reliability in complex and extreme environments, this work chose a resistive continuous-time feedback architecture. For a resistive TIA, the input current noise can be expressed as:

(2)

(3)

where denotes the total input current noise, and are the current noise of feedback resistor *RF* and the amplifier OTA.

Equations (2) and (3) indicate that a larger transimpedance can reduce the contribution of the feedback resistor to the current noise, while the size of the transimpedance also determines the transimpedance gain of the TIA. However, an excessively large transimpedance would occupy too much layout area and reduce the system's effective bandwidth. Based on the electrochemical input model and signal characteristics, we ultimately chose RF=257 MΩ, which provides a good balance between performance requirements.

To reduce the noise of the integrator, we optimized the design at the transistor level. First, PMOS inputs were selected due to their lower flicker noise, with dimensions of *W/L*=784 μm/240 nm. The efficient *gm/Id* and large gate area reduce noise and mismatch. Compared to traditional discrete components, the design advantages of integrated circuits reduce the parasitic capacitance introduced by wiring, further benefiting noise optimization. Additionally, the introduction of source degeneration resistors reduces the effective transconductance of the load transistors *gm,eff​*. The flicker noise of the active load current can be expressed as:

(4)

The introduction of source degeneration resistors effectively reduces the flicker noise of the load transistors. The thermal noise of the system can be expressed as:

(5)

The former demonstrates that the attenuation of the equivalent transconductance of the active load transistors contributes to the optimization of thermal noise, while the latter represents the thermal noise introduced by the resistor in the source degeneration technique. To prevent this resistor from becoming the primary noise source, it is necessary to ensure that *gmRs*1. Under this condition, the system can achieve the optimal thermal noise level.

1. **Heavy metal detection in artificial seawater**

Supplementary Figures 4a and 4b present the TIA for detecting heavy metals in artificial seawater. We prepared artificial seawater with different concentration gradients of Cd²⁺ and Pb²⁺ in a base solution of 3.5% NaCl, without adding any other electrolytes or acids, to simulate real seawater conditions. Differential pulse stripping voltammetry (DPSV) was used to detect Cd²⁺ and Pb²⁺. Input Signal is a staircase rectangular wave. During each pulse cycle, current signals were collected at both the high and low levels, and the difference between them produced the voltammogram.

In the low concentration range (0.05-5 μg/L), R2 values are 0.999 for both Cd2+ and Pb2+. Cd2+ standard curve is as follows:

(6)

Pb2+ standard curve is as follows:

(7)

Where *x* is the concentration of Cd2+ and Pb2+ in the solution to be tested, the unit is μg/L.

Where *y* is the peak current, the unit is nA.

In the high concentration range (5-500 μg/L), R2 values are 0.999 for Cd2+ and 0.997 for Pb2+. Cd2+ standard curve is as follows:

(8)

Pb2+ standard curve is as follows:

(9)


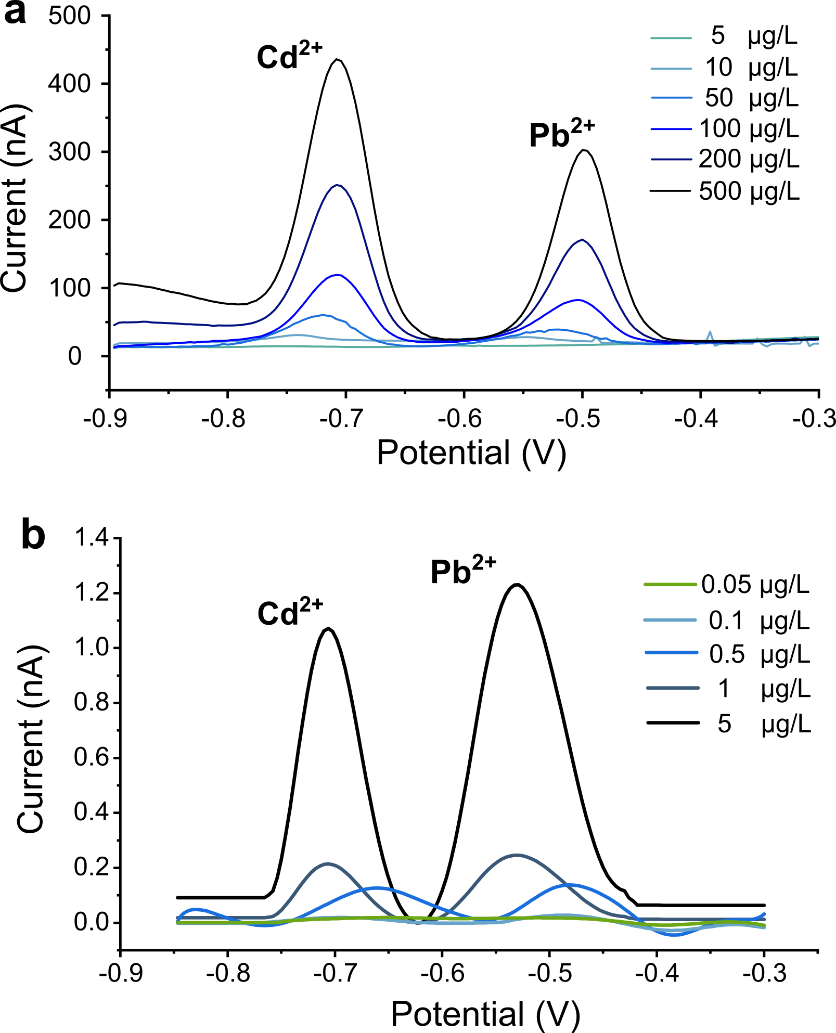


**Supplementary Figure 4:** DPSV detection of different concentration gradients in artificial seawater.
